# Supplementary material
Source: PubMed Central journal article supplement (PMC4067978)
Supplement: NIHMS577291-supplement-Supplementary_material.pdf [file NIHMS577291-supplement-Supplementary_material.pdf]

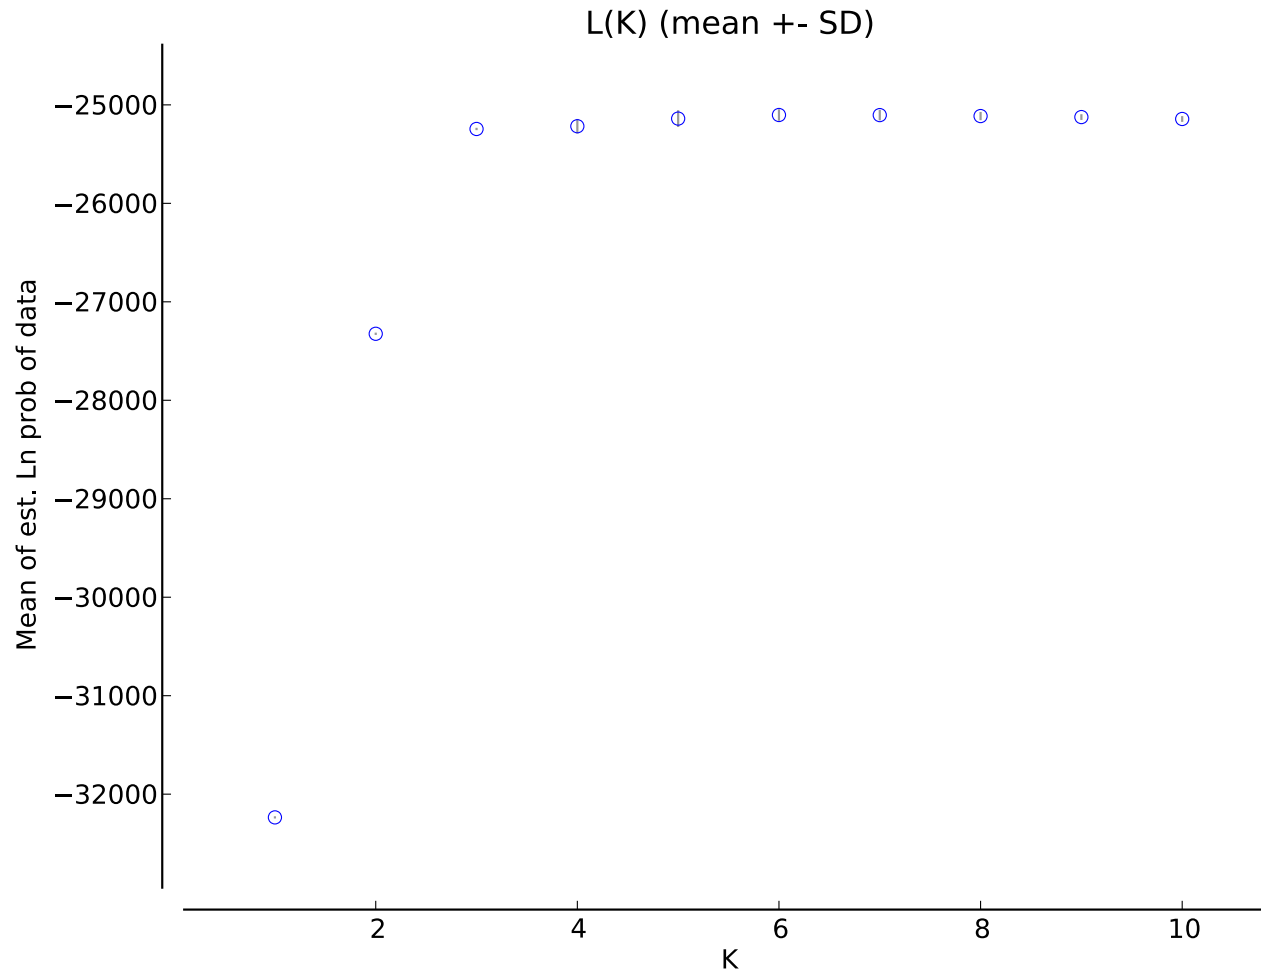

1  
2  
3 **Figure S1** Results of Structure Harvester (Earl 2011), indicating likelihood ( $\text{LnP}(K)$ ) scores of  $K$  populations (1-10).

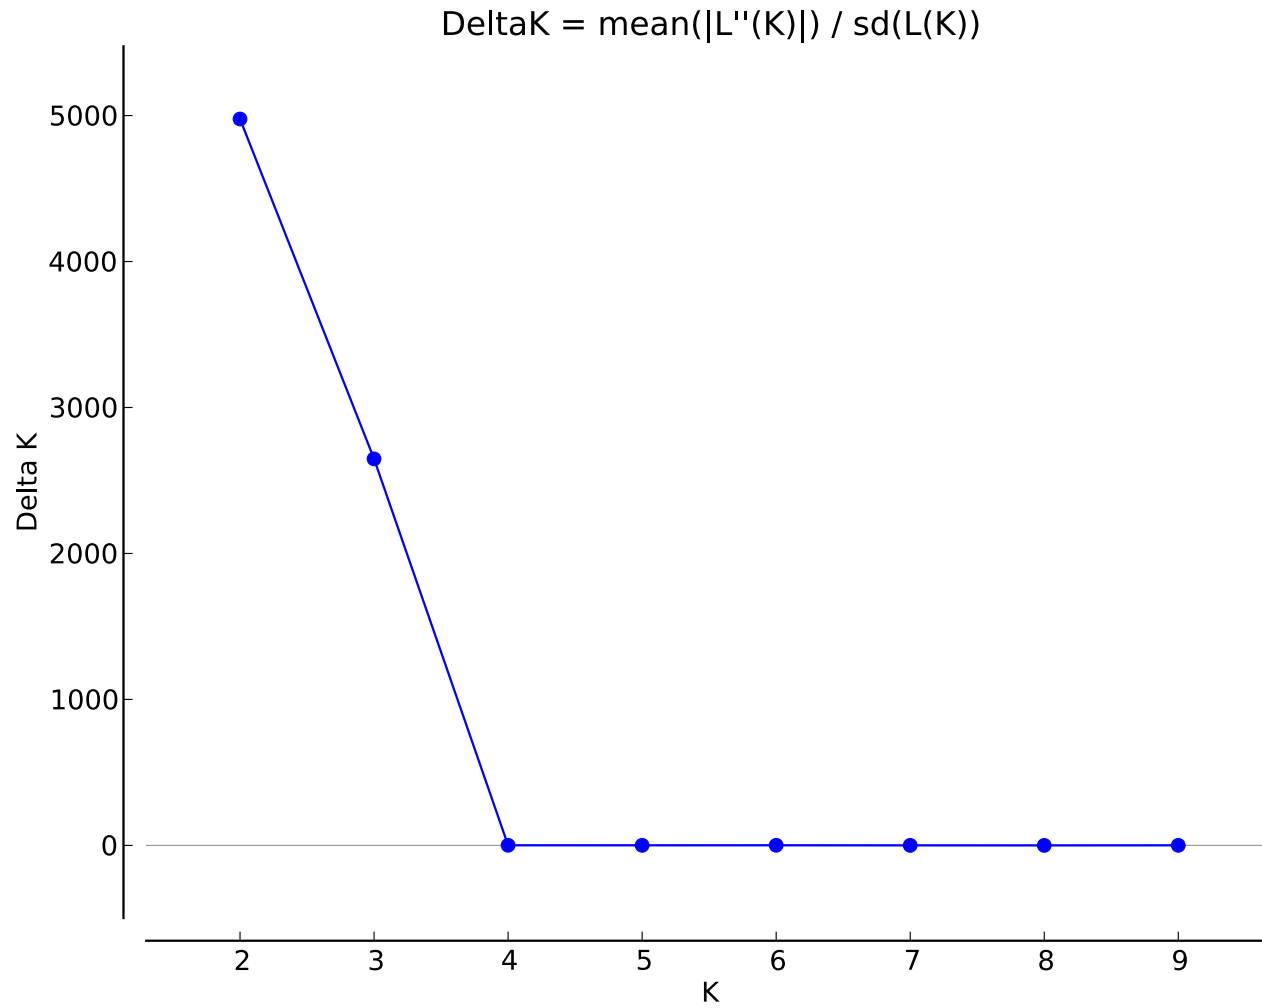

4  
5 **Figure S2** Results of Structure Harvester (Earl 2011), indicating DeltaK values for  $K$  populations (1-9).

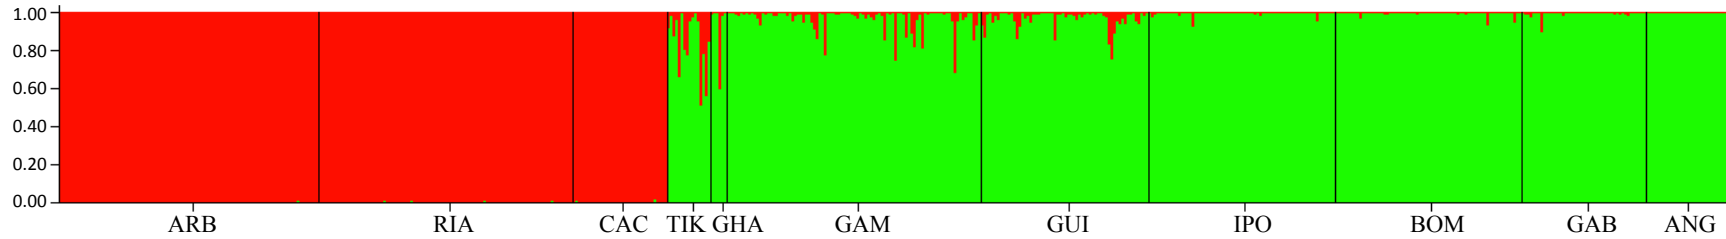

6  
7  
8 **Figure S3** Results of the Bayesian assignment test for two putative populations ( $K=2$ ) based upon microsatellite DNA data  
9 implemented in the program Structure (Pritchard *et al.* 2000). Each vertical bar corresponds to a single individual, and colors represent  
10 the proportion of the genome that is assigned to a particular cluster based upon the admixture model. Sample populations are  
11 annotated according to population abbreviations defined in Table 1.

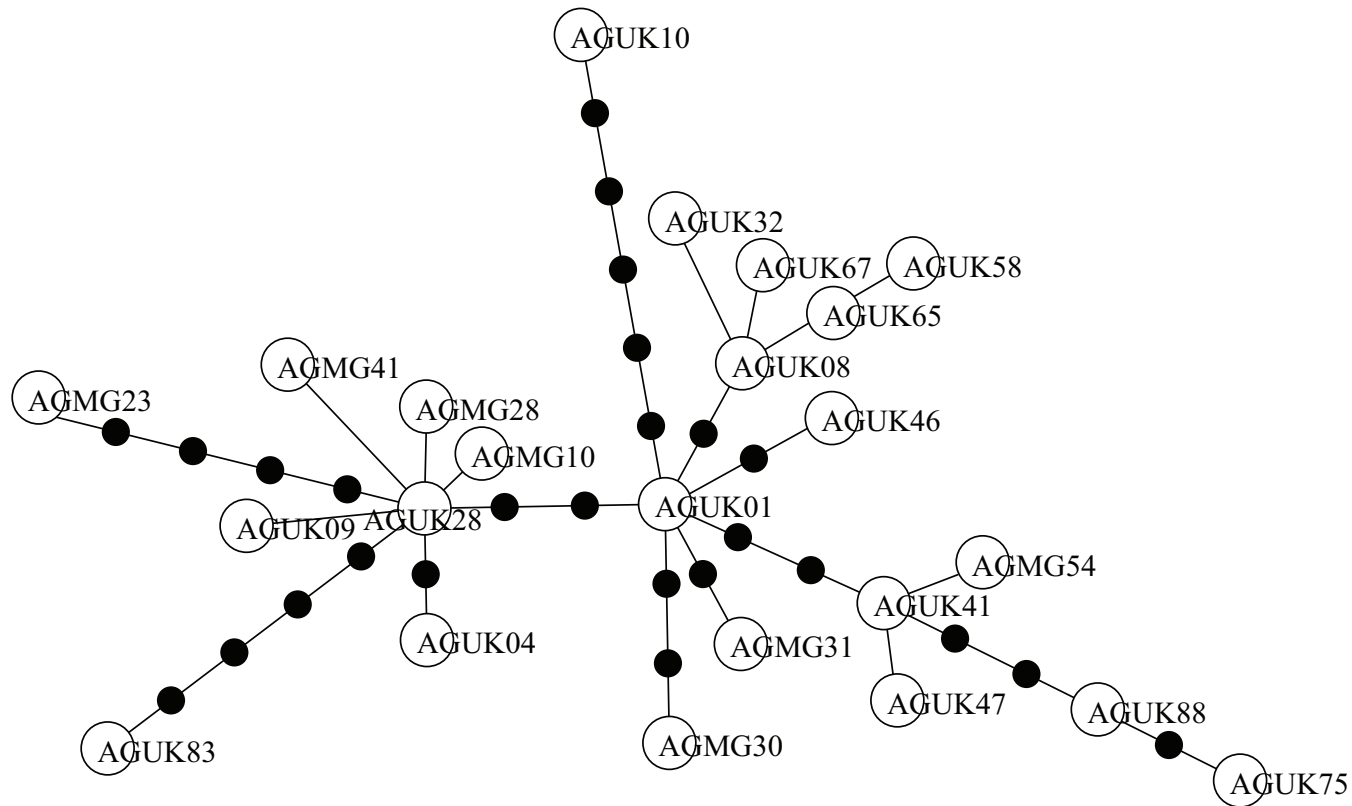

12  
13 **Figure S4** *An. gambiae* minimum spanning tree (Kruskal 1956, Prim 1957) constructed in the program Arlequin ver. 3.5.1.2  
14 (Excoffier and Lischer 2010), and visualized using HapStar (Teacher and Griffiths 2011). White circles represent sampled haplotypes  
15 and black intermediate circles represent ancestral or unsampled haplotypes. Haplotypes represent *An. gambiae* collected from  
16 Mongola (Bioko Island, E.G., AGMG##) and Ukomba (mainland, E.G., AGUK##), and do not show any geographic clustering.

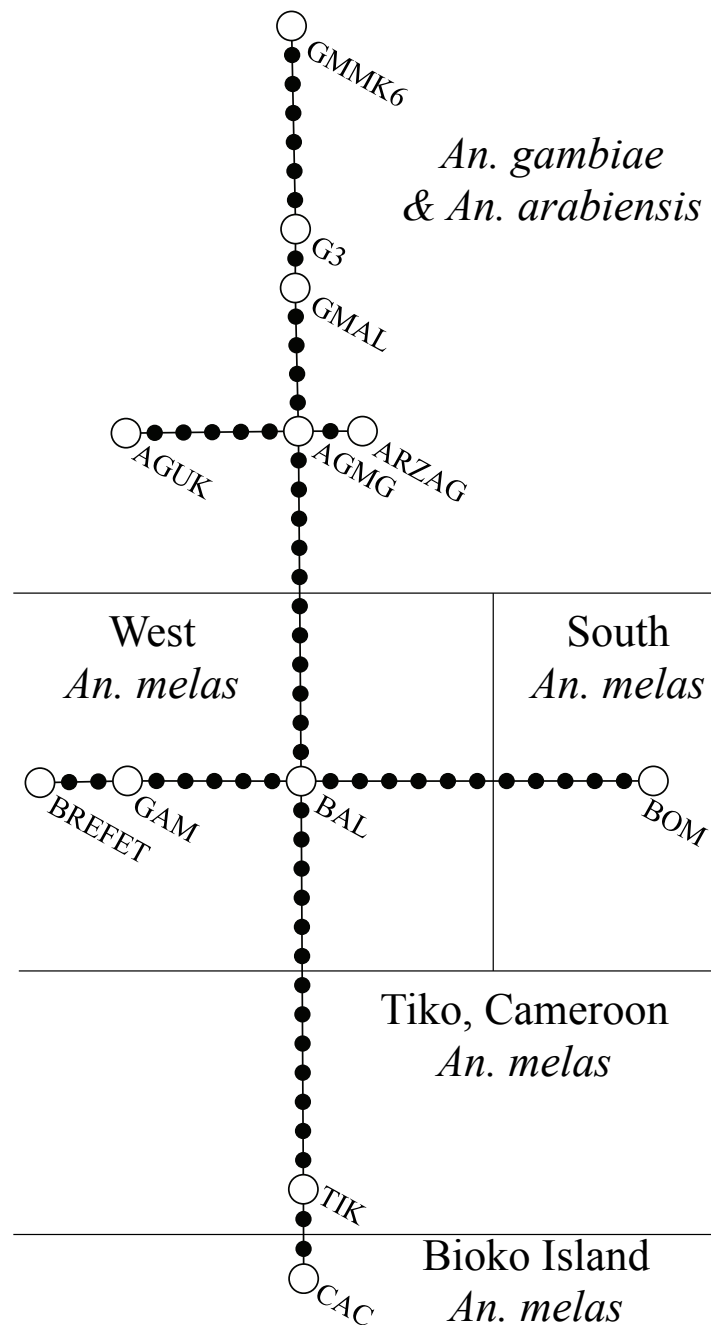

17  
18  
19  
20  
21  
22  
23  
24  
25  
26

**Figure S5** *An. gambiae* complex minimum spanning tree (Kruskal 1956, Prim 1957) constructed in the program Arlequin ver. 3.5.1.2 (Excoffier and Lischer 2010), and visualized using HapStar (Teacher and Griffiths 2011). White circles represent sampled haplotypes and black intermediate circles represent ancestral or unsampled haplotypes. Population and strain abbreviations refer to those defined in Table 1 and Table S1, respectively. Population and species clusters are annotated according to *An. melas* population cluster or species (if different from *An. melas*).

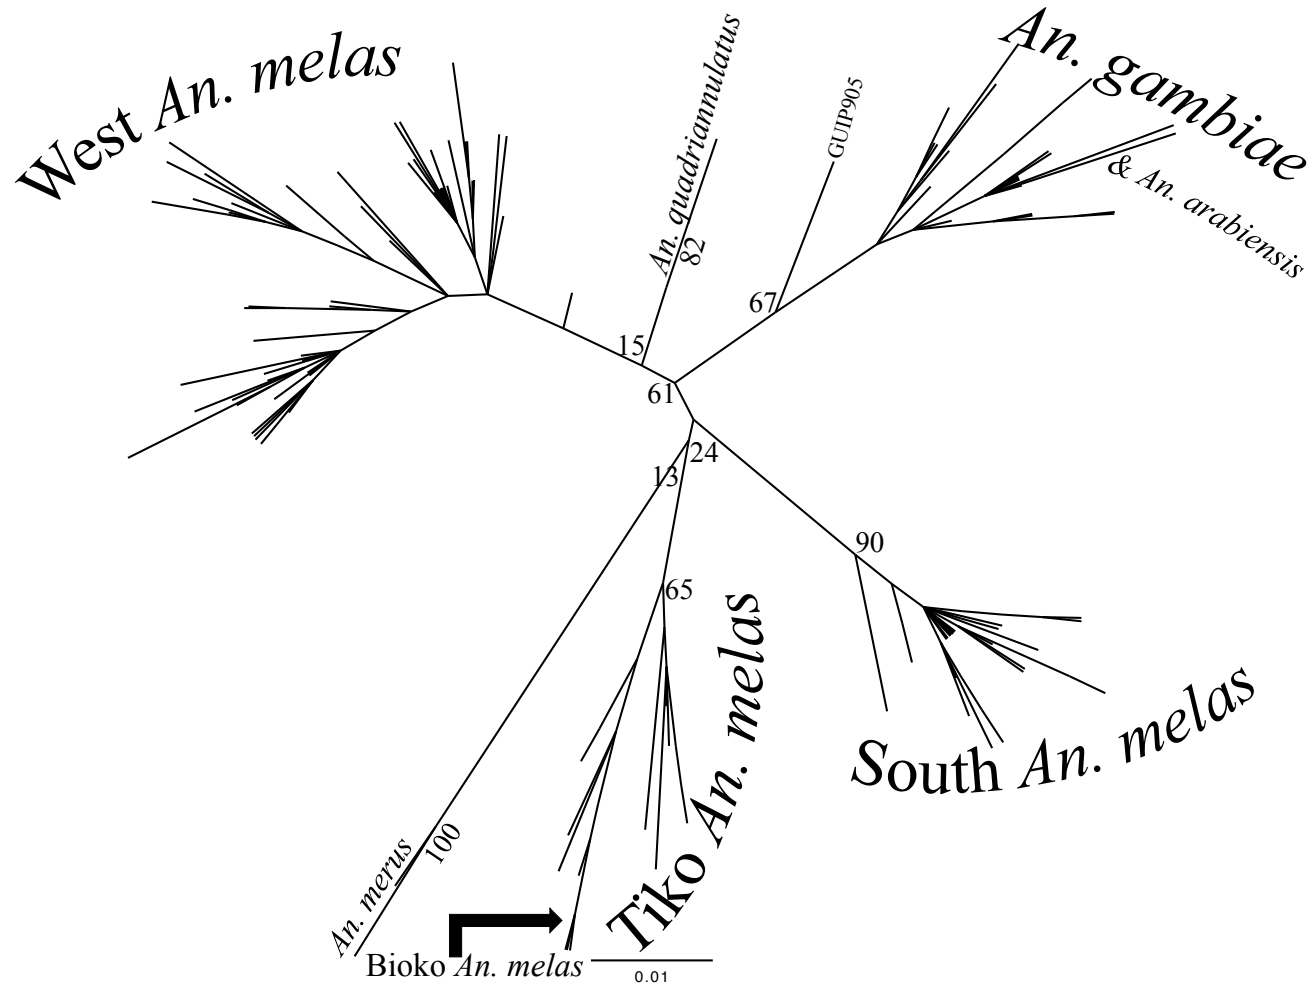

27  
28  
29  
30  
31

**Figure S6** Unrooted maximum likelihood tree of *An. gambiae* complex member species including Central, West, and Bioko Island *An. melas* populations. Node annotations indicate bootstrap support resulting from 1000 replicates. Population and species clusters are annotated according to *An. melas* population cluster or species (if different from *An. melas*).

32

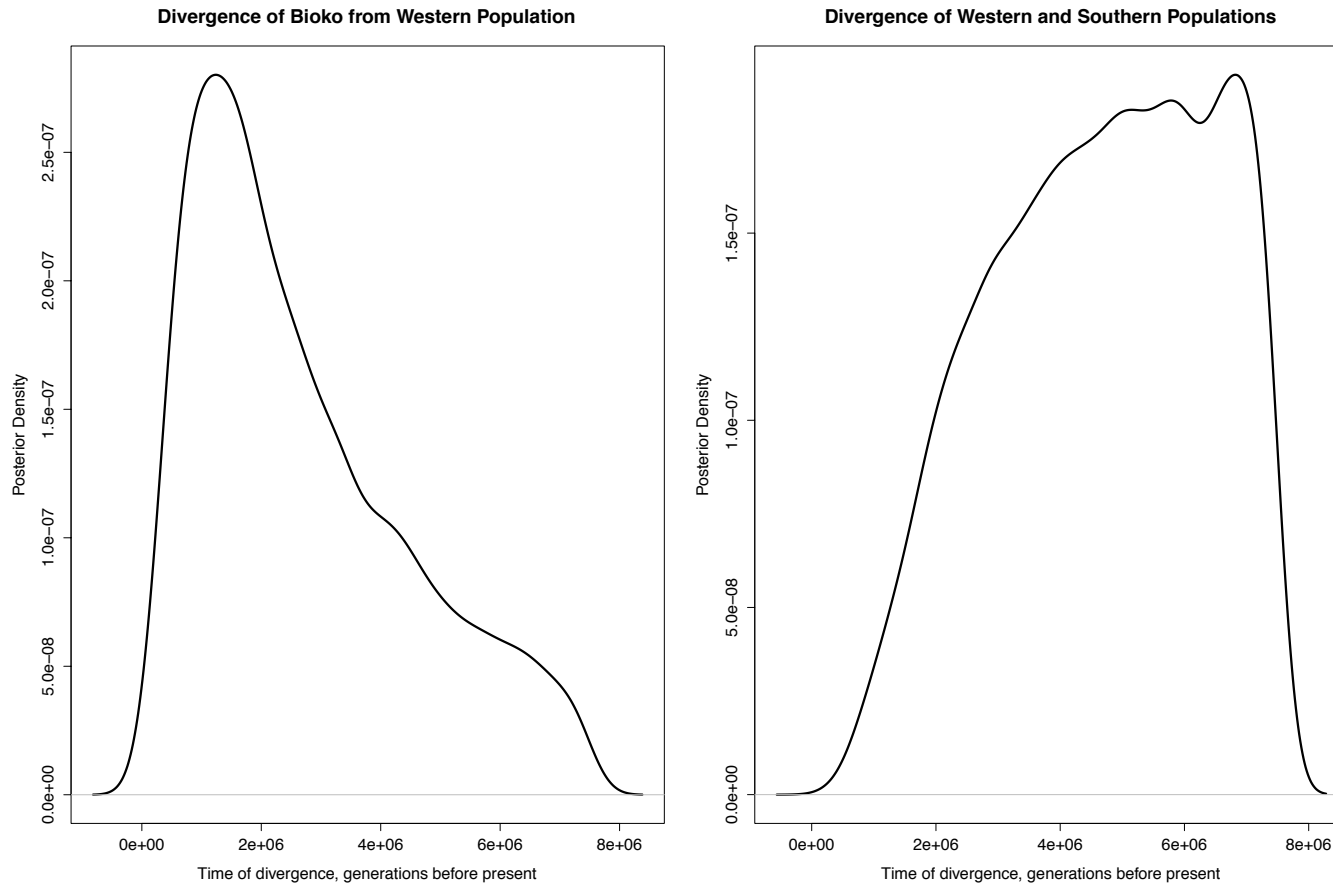

33  
34  
35  
36  
37

**Figure S7** Posterior density plots for the timing of divergence events (generations before present) of a) Bioko Island from the western cluster and b) of the split between the western and southern clusters, as estimated by approximated Bayesian computation.

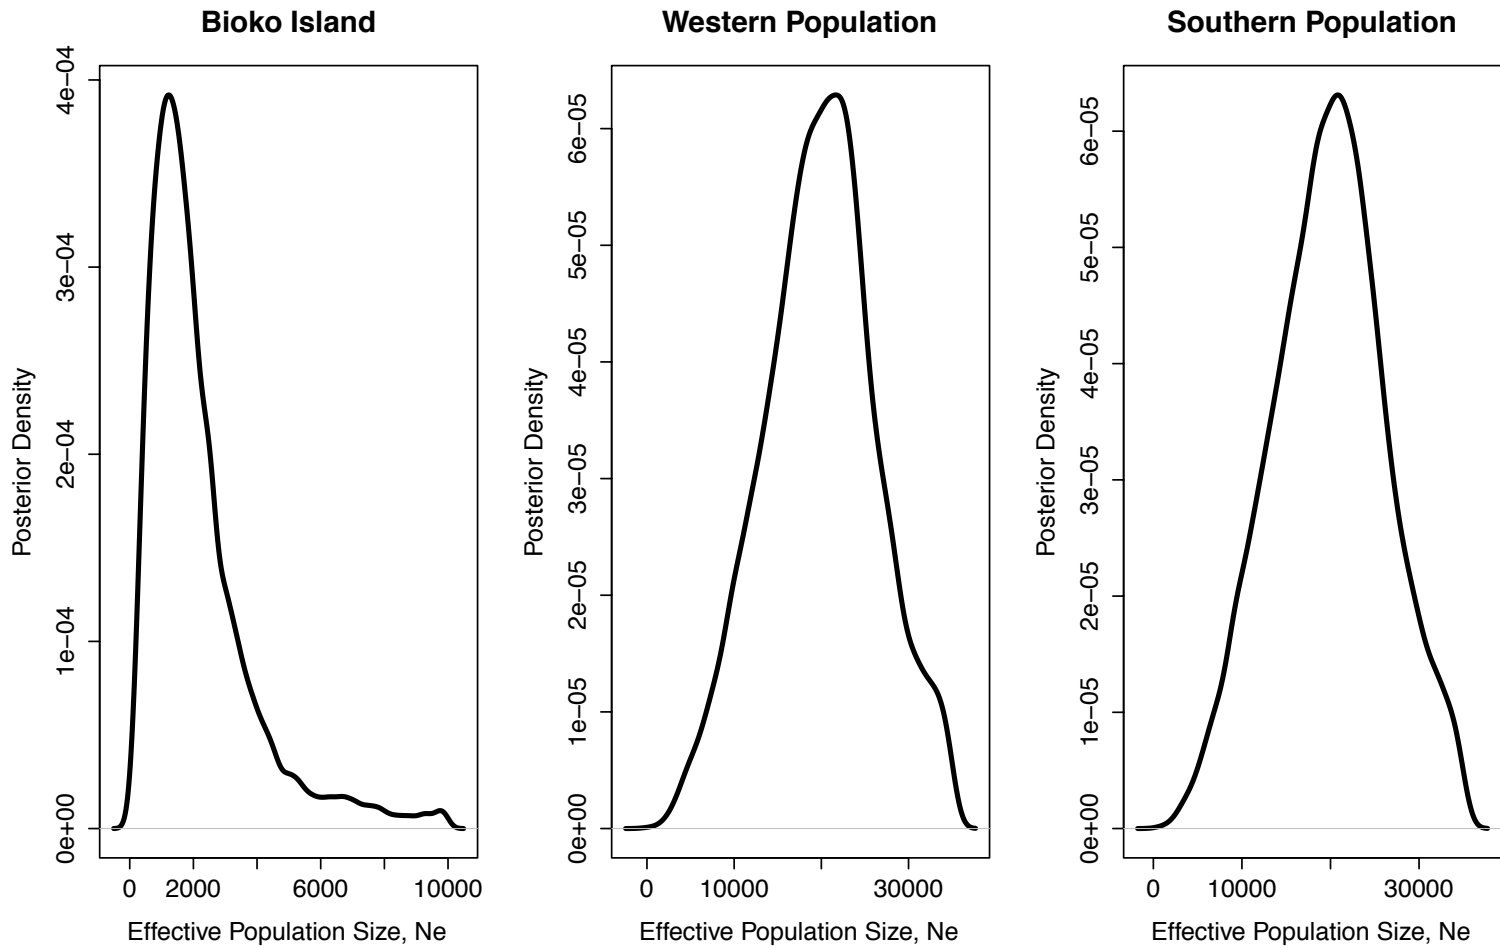

38  
39 **Figure S8** Posterior density plots of effective population size ( $N_e$ ) estimates for the three main populations considered in ABC  
40 analysis – the Western and Southern population clusters and Bioko island.



41  
42  
43  
44  
45**SUPPLEMENTARY TABLES**

**Table S1** *An. gambiae* Complex ND4-ND5 mtDNA sequences that represent 5 different species from the *An. gambiae* complex and were originally published by Besansky *et al.* (1994).

| Species                    | Abbreviation | GenBank<br>Accession No. | Geographical<br>Origin |
|----------------------------|--------------|--------------------------|------------------------|
| <i>An. melas</i>           | BAL          | U10123                   | The Gambia             |
| <i>An. arabiensis</i>      | GMAL         | U10124                   | Sudan                  |
| <i>An. arabiensis</i>      | ARZAG        | U10125                   | Burkina Faso           |
| <i>An. gambiae</i>         | G3           | U10126                   | The Gambia             |
| <i>An. gambiae</i>         | GMMK6        | U10127                   | Burkina Faso           |
| <i>An. gambiae</i>         | MUHEZA       | U10128                   | Tanzania               |
| <i>An. melas</i>           | BREFET       | U10129                   | The Gambia             |
| <i>An. merus</i>           | V12          | U10130                   | Kenya                  |
| <i>An. merus</i>           | ZULU         | U10131                   | Zululand               |
| <i>An. quadriannulatus</i> | CHIL         | U10132                   | Zimbabwe               |
| <i>An. quadriannulatus</i> | SQUAD        | U10133                   | Unknown                |

46

47 **Table S2:** Description of Individual Scenarios: (Note: although coalescent simulations go backwards in time and were  
 48 coded as such, to simplify interpretation, they are described as if occurring forwards in time, as in reality). For prior  
 49 distributions of parameters, refer to Table S3

50 .

| Scenario | Description                                                                                                                                                                                                                                                                                                                                                                                                                               | Parameters                                                                                                                                                                 | Explanation                                                                                                                                                                                                                                                           |
|----------|-------------------------------------------------------------------------------------------------------------------------------------------------------------------------------------------------------------------------------------------------------------------------------------------------------------------------------------------------------------------------------------------------------------------------------------------|----------------------------------------------------------------------------------------------------------------------------------------------------------------------------|-----------------------------------------------------------------------------------------------------------------------------------------------------------------------------------------------------------------------------------------------------------------------|
| 1        | An ancestral cluster (Nw+N <sub>s</sub> ) was divided into the Western (N <sub>w</sub> ) and Southern (N <sub>s</sub> ) clusters through vicariance, with the Southern population being ancestral. More recently, the Bioko Island population (N <sub>b</sub> ) split off from the western cluster through a vicariance event.                                                                                                            | N <sub>b</sub><br>N <sub>w</sub><br>N <sub>s</sub><br>N <sub>w</sub> +N <sub>s</sub><br>T1 <sub>b</sub><br>T1 <sub>a</sub><br>0                                            | Ne of Bioko<br>Ne of Western<br>Ne of Southern<br>Ancestral Population before vicariance<br>Time of split between W & S<br>Time of split of Bioko<br>Present                                                                                                          |
| 2        | An ancestral population (N <sub>anc</sub> ) gave rise to the Western and Southern clusters via founding events, creating bottlenecked populations N <sub>wf</sub> (Western) and N <sub>sf</sub> (Southern), which expanded to contemporary populations N <sub>w</sub> , and N <sub>s</sub> . The ancestral population was in the south. More recently, the Bioko island population split off from the Western cluster through vicariance. | N <sub>b</sub><br>N <sub>w</sub><br>N <sub>s</sub><br>N <sub>anc</sub><br>T1 <sub>b</sub><br>T1 <sub>a</sub><br>T1 <sub>c</sub><br>0<br>N <sub>wf</sub><br>N <sub>sf</sub> | Ne of Bioko<br>Ne of Western<br>Ne of Southern<br>Ancestral Population to W & S<br>Time of split between W & S<br>Time of split of Bioko<br>Time of W&S founder event<br>Present<br>Ne of Western following founding event<br>Ne of Southern following founding event |

|   |                                                                                                                                                                                                                                                                                                                                                                                                                                                                                                |                                                                                                                |                                                                                                                                                                                                                                                                                                                                                                                                                                |
|---|------------------------------------------------------------------------------------------------------------------------------------------------------------------------------------------------------------------------------------------------------------------------------------------------------------------------------------------------------------------------------------------------------------------------------------------------------------------------------------------------|----------------------------------------------------------------------------------------------------------------|--------------------------------------------------------------------------------------------------------------------------------------------------------------------------------------------------------------------------------------------------------------------------------------------------------------------------------------------------------------------------------------------------------------------------------|
| 3 | <p>An ancestral population (Nanc) gave rise to the Western and Southern clusters through founding events, creating bottlenecked populations Nwf (western) and Nsf (southern), which expanded to contemporary populations Nw and Ns. The ancestral population was from the south. More recently, the Bioko island population was created through a founding event (Nbf) from the Western cluster. The Bioko population expanded to Nb following this founding event.</p>                        | <p>Nb<br/>Nw<br/>Ns<br/>Nanc<br/>T1b<br/>T1a<br/>T1c<br/>T1d<br/>0<br/>Nwf<br/>Nsf<br/>Nbf</p>                 | <p>Ne of Bioko<br/>Ne of Western<br/>Ne of Southern<br/>Ancestral Population to W &amp; S<br/>Time of split between W &amp; S<br/>Time of split of Bioko<br/>Time of W &amp; S founder events<br/>Time of Bioko founder event<br/>Present<br/>Ne of Western at founder event<br/>Ne of Southern at founder event<br/>Ne of Bioko at founder event</p>                                                                          |
| 4 | <p>An ancestral population (Nanc) gave rise to the Western and Southern clusters through founding events, creating bottlenecked populations Nwf (western) and Nsf (southern), which expanded to contemporary populations Nw and Ns. The ancestral population was from the south. More recently, the Bioko island population was created through a founding event (Nbf) from the Western cluster. A very recent vector-control induced bottleneck reduced population sizes on Bioko to Nbb.</p> | <p>Nb<br/>Nw<br/>Ns<br/>Nanc<br/>T1b<br/>T1a<br/>T1c<br/>T1d<br/>T1e<br/>0<br/>Nwf<br/>Nsf<br/>Nbf<br/>Nbb</p> | <p>Ne of Bioko<br/>Ne of Western<br/>Ne of Southern<br/>Ancestral Population to W &amp; S<br/>Time of split between W &amp; S<br/>Time of split of Bioko<br/>Time of W &amp; S founder events<br/>Time of Bioko founder event<br/>Time of recent Bioko bottleneck<br/>Present<br/>Ne of Western at founder event<br/>Ne of Southern at founder event<br/>Ne of Bioko at founder event<br/>Ne of Bioko at recent bottleneck</p> |

|   |                                                                                                                                                                                                                                                                                                                                                           |                                                                        |                                                                                                                                                                                                                                                                                                    |
|---|-----------------------------------------------------------------------------------------------------------------------------------------------------------------------------------------------------------------------------------------------------------------------------------------------------------------------------------------------------------|------------------------------------------------------------------------|----------------------------------------------------------------------------------------------------------------------------------------------------------------------------------------------------------------------------------------------------------------------------------------------------|
| 5 | An ancestral cluster (Nw+Ns) was divided into the Western (Nw) and Southern (Ns) clusters through vicariance, with the Southern being ancestral. More recently, the Bioko island population was created during a founding event (Nbf) from the Western cluster. A very recent vector-control induced bottleneck reduced population sizes on Bioko (Nbb).. | Nb<br>Nw<br>Ns<br>Nw+Ns<br>T1b<br>T1a<br>T1d<br>T1e<br>0<br>Nbf<br>Nbb | Ne of Bioko<br>Ne of Western<br>Ne of Southern<br>Ancestral Population before vicariance<br>Time of split between W & S<br>Time of split of Bioko<br>Time of Bioko founder event<br>Time of recent Bioko bottleneck<br>Present<br>Ne of Bioko at founder event<br>Ne of Bioko at recent bottleneck |
| 6 | An ancestral cluster (Nw+Ns) was divided into the Western (Nw) and Southern (Ns) clusters through vicariance, with the southern being ancestral. More recently, the Bioko island population was created during a founding event (Nbf) from the Western cluster. The Bioko population expanded to Nb after this initial founding event.                    | Nb<br>Nw<br>Ns<br>Nw+Ns<br>T1b<br>T1a<br>T1d<br>0<br>Nbf               | Ne of Bioko<br>Ne of Western<br>Ne of Southern<br>Ancestral Population before vicariance<br>Time of split between W & S<br>Time of split of Bioko<br>Time of Bioko founder event<br>Present<br>Ne of Bioko at founder event                                                                        |
| 7 | An ancestral cluster (Nw+Ns) was divided into the Western (Nw) and Southern (Ns) clusters through vicariance, with the Western being ancestral. More recently, the Bioko Island population (Nb) was split off from the Western cluster through vicariance.                                                                                                | Nb<br>Nw<br>Ns<br>Nw+Ns<br>T2b<br>T2a<br>0                             | Ne of Bioko<br>Ne of Western<br>Ne of Southern<br>Ancestral Population before vicariance<br>Time of split between W & S<br>Time of split of Bioko<br>Present                                                                                                                                       |

|   |                                                                                                                                                                                                                                                                                                                                                                                                                                                          |                                                                                                |                                                                                                                                                                                                                                                                                                                                                       |
|---|----------------------------------------------------------------------------------------------------------------------------------------------------------------------------------------------------------------------------------------------------------------------------------------------------------------------------------------------------------------------------------------------------------------------------------------------------------|------------------------------------------------------------------------------------------------|-------------------------------------------------------------------------------------------------------------------------------------------------------------------------------------------------------------------------------------------------------------------------------------------------------------------------------------------------------|
| 8 | <p>An ancestral population (Nanc) gave rise to the Western and Southern clusters via founding events, creating bottlenecked populations Nwf (Western) and Nsf (Southern), which later expanded to contemporary populations Nw and Ns. The ancestral population was in the west. More recently, the Bioko island population split off from the western cluster through vicariance.</p>                                                                    | <p>Nb<br/>Nw<br/>Ns<br/>Nanc<br/>T2b<br/>T2a<br/>T2c<br/>0<br/>Nwf<br/>Nsf</p>                 | <p>Ne of Bioko<br/>Ne of Western<br/>Ne of Southern<br/>Ancestral Population to W &amp; S<br/>Time of split between W &amp; S<br/>Time of split of Bioko<br/>Time of W&amp;S founder event<br/>Present<br/>Ne of Western following founding event<br/>Ne of Southern following founding event</p>                                                     |
| 9 | <p>An ancestral population (Nanc) gave rise to the Western and Southern clusters through founding events, creating bottlenecked populations Nwf (western) and Nsf (southern), which later expanded to contemporary populations Nw and Ns. The ancestral population was in the west. More recently, the Bioko island population was created during a founding event (Nbf) from the Western cluster. The Bioko population subsequently expanded to Nb.</p> | <p>Nb<br/>Nw<br/>Ns<br/>Nanc<br/>T2b<br/>T2a<br/>T2c<br/>T2d<br/>0<br/>Nwf<br/>Nsf<br/>Nbf</p> | <p>Ne of Bioko<br/>Ne of Western<br/>Ne of Southern<br/>Ancestral Population to W &amp; S<br/>Time of split between W &amp; S<br/>Time of split of Bioko<br/>Time of W &amp; S founder events<br/>Time of Bioko founder event<br/>Present<br/>Ne of Western at founder event<br/>Ne of Southern at founder event<br/>Ne of Bioko at founder event</p> |

|    |                                                                                                                                                                                                                                                                                                                                                                                                                                                                                     |                                                                                            |                                                                                                                                                                                                                                                                                                                                                                                                |
|----|-------------------------------------------------------------------------------------------------------------------------------------------------------------------------------------------------------------------------------------------------------------------------------------------------------------------------------------------------------------------------------------------------------------------------------------------------------------------------------------|--------------------------------------------------------------------------------------------|------------------------------------------------------------------------------------------------------------------------------------------------------------------------------------------------------------------------------------------------------------------------------------------------------------------------------------------------------------------------------------------------|
| 10 | An ancestral population (Nanc) gave rise to the Western and Southern clusters through founding events, creating bottlenecked populations Nwf (Western) and Nsf (Southern), which expanded to contemporary populations Nw and Ns. The ancestral population was in the west. More recently, the Bioko island population was created through a founding event (Nbf) from the Western cluster. A very recent vector-control induced bottleneck reduced population sizes on Bioko (Nbb). | Nb<br>Nw<br>Ns<br>Nanc<br>T2b<br>T2a<br>T2c<br>T2d<br>T2e<br>0<br>Nwf<br>Nsf<br>Nbf<br>Nbb | Ne of Bioko<br>Ne of Western<br>Ne of Southern<br>Ancestral Population to W & S<br>Time of split between W & S<br>Time of split of Bioko<br>Time of W & S founder events<br>Time of Bioko founder event<br>Time of recent Bioko bottleneck<br>Present<br>Ne of Western at founder event<br>Ne of Southern at founder event<br>Ne of Bioko at founder event<br>Ne of Bioko at recent bottleneck |
| 11 | An ancestral cluster (Nw+Ns) was divided into the Western (Nw) and Southern (Ns) clusters through vicariance. The ancestral population was in the west. More recently, the Bioko island population was created through a founding event (Nbf) from the Western cluster. A very recent vector-control induced bottleneck reduced population sizes on Bioko (Nbb).                                                                                                                    | Nb<br>Nw<br>Ns<br>Nw+Ns<br>T2b<br>T2a<br>T2d<br>T2e<br>0<br>Nbf<br>Nbb                     | Ne of Bioko<br>Ne of Western<br>Ne of Southern<br>Ancestral Population before vicariance<br>Time of split between W & S<br>Time of split of Bioko<br>Time of Bioko founder event<br>Time of recent Bioko bottleneck<br>Present<br>Ne of Bioko at founder event<br>Ne of Bioko at recent bottleneck                                                                                             |

|    |                                                                                                                                                                                                                                                                                                                                                                               |                                                                |                                                                                                                                                                                                                                                                       |
|----|-------------------------------------------------------------------------------------------------------------------------------------------------------------------------------------------------------------------------------------------------------------------------------------------------------------------------------------------------------------------------------|----------------------------------------------------------------|-----------------------------------------------------------------------------------------------------------------------------------------------------------------------------------------------------------------------------------------------------------------------|
| 12 | An ancestral cluster (Nw+Ns) was divided into the Western (Nw) and Southern (Ns) clusters through vicariance. The ancestral population is in the west. More recently, the Bioko island population was created through a founding event (Nbf) from the Western cluster. It subsequently expanded to Nb after this initial founding event.                                      | Nb<br>Nw<br>Ns<br>Nw+Ns<br>T2b<br>T2a<br>T2d<br>0<br>Nbf       | Ne of Bioko<br>Ne of Western<br>Ne of Southern<br>Ancestral Population before vicariance<br>Time of split between W & S<br>Time of split of Bioko<br>Time of Bioko founder event<br>Present<br>Ne of Bioko at founder event                                           |
| 13 | An ancestral cluster (Nw+Ns) was divided into the Western (Nw) and Southern (Ns) clusters through vicariance. The ancestral population was in the south. More recently, a vicariance event divided the Bioko Island population (Nb) and the Southern cluster.                                                                                                                 | Nb<br>Nw<br>Ns<br>Nw+Ns<br>T3b<br>T3a<br>0                     | Ne of Bioko<br>Ne of Western<br>Ne of Southern<br>Ancestral Population before vicariance<br>Time of split between W & S<br>Time of split of Bioko<br>Present                                                                                                          |
| 14 | An ancestral population (Nanc) gave rise to the two population clusters via founding events, creating bottlenecked populations Nwf (Western) and Nsf (Southern). These later expanded to contemporary populations Nw, and Ns. The ancestral population was from the south. More recently, the Bioko island population split off from the Southern cluster through vicariance. | Nb<br>Nw<br>Ns<br>Nanc<br>T3b<br>T3a<br>T3c<br>0<br>Nwf<br>Nsf | Ne of Bioko<br>Ne of Western<br>Ne of Southern<br>Ancestral Population to W & S<br>Time of split between W & S<br>Time of split of Bioko<br>Time of W&S founder event<br>Present<br>Ne of Western following founding event<br>Ne of Southern following founding event |

|    |                                                                                                                                                                                                                                                                                                                                                                                                                                                                                         |                                                                                            |                                                                                                                                                                                                                                                                                                                                                                                                |
|----|-----------------------------------------------------------------------------------------------------------------------------------------------------------------------------------------------------------------------------------------------------------------------------------------------------------------------------------------------------------------------------------------------------------------------------------------------------------------------------------------|--------------------------------------------------------------------------------------------|------------------------------------------------------------------------------------------------------------------------------------------------------------------------------------------------------------------------------------------------------------------------------------------------------------------------------------------------------------------------------------------------|
| 15 | An ancestral population (Nanc) gave rise to the Western and Southern clusters through founding events, creating bottlenecked populations Nwf (western) and Nsf (southern). These later expanded to contemporary populations Nw and Ns. The ancestral population was from the south. More recently, the Bioko island population was created through a founding event (Nbf) from the Southern cluster. The Bioko population expanded to Nb after this initial founding event.             | Nb<br>Nw<br>Ns<br>Nanc<br>T3b<br>T3a<br>T3c<br>T3d<br>0<br>Nwf<br>Nsf<br>Nbf               | Ne of Bioko<br>Ne of Western<br>Ne of Southern<br>Ancestral Population to W & S<br>Time of split between W & S<br>Time of split of Bioko<br>Time of W & S founder events<br>Time of Bioko founder event<br>Present<br>Ne of Western at founder event<br>Ne of Southern at founder event<br>Ne of Bioko at founder event                                                                        |
| 16 | An ancestral population (Nanc) gave rise to the Western and Southern clusters through founding events, creating bottlenecked populations Nwf (Western) and Nsf (Southern). These expanded to contemporary populations Nw and Ns. The ancestral population was from the south. More recently, the Bioko island population was created through a founding event (Nbf) from the Southern cluster. A very recent vector-control induced bottleneck reduced population sizes on Bioko (Nbb). | Nb<br>Nw<br>Ns<br>Nanc<br>T3b<br>T3a<br>T3c<br>T3d<br>T3e<br>0<br>Nwf<br>Nsf<br>Nbf<br>Nbb | Ne of Bioko<br>Ne of Western<br>Ne of Southern<br>Ancestral Population to W & S<br>Time of split between W & S<br>Time of split of Bioko<br>Time of W & S founder events<br>Time of Bioko founder event<br>Time of recent Bioko bottleneck<br>Present<br>Ne of Western at founder event<br>Ne of Southern at founder event<br>Ne of Bioko at founder event<br>Ne of Bioko at recent bottleneck |



|    |                                                                                                                                                                                                                                                                                                                                                                                                                                                   |                                                                                                                                                                                                             |                                                                                                                                                                                                                                                                                                    |
|----|---------------------------------------------------------------------------------------------------------------------------------------------------------------------------------------------------------------------------------------------------------------------------------------------------------------------------------------------------------------------------------------------------------------------------------------------------|-------------------------------------------------------------------------------------------------------------------------------------------------------------------------------------------------------------|----------------------------------------------------------------------------------------------------------------------------------------------------------------------------------------------------------------------------------------------------------------------------------------------------|
| 17 | An ancestral cluster (Nw+N <sub>s</sub> ) was divided into the Western (Nw) and Southern (N <sub>s</sub> ) clusters by vicariance, The ancestral population was in the south. More recently, the Bioko island population was created during a founding event (N <sub>bf</sub> ) from the Southern cluster. Following this initial founding, a very recent vector-control induced bottleneck reduced population sizes on Bioko (N <sub>bb</sub> ). | N <sub>b</sub><br>N <sub>w</sub><br>N <sub>s</sub><br>N <sub>w</sub> +N <sub>s</sub><br>T <sub>3b</sub><br>T <sub>3a</sub><br>T <sub>3d</sub><br>T <sub>3e</sub><br>0<br>N <sub>bf</sub><br>N <sub>bb</sub> | Ne of Bioko<br>Ne of Western<br>Ne of Southern<br>Ancestral Population before vicariance<br>Time of split between W & S<br>Time of split of Bioko<br>Time of Bioko founder event<br>Time of recent Bioko bottleneck<br>Present<br>Ne of Bioko at founder event<br>Ne of Bioko at recent bottleneck |
| 18 | An ancestral cluster (Nw+N <sub>s</sub> ) was divided into the Western (Nw) and Southern (N <sub>s</sub> ) clusters through vicariance. The ancestral population was in the south. More recently, the Bioko island population was created during a founding event (N <sub>bf</sub> ) from the South. The Bioko population expanded to N <sub>b</sub> after this initial founding event.                                                           | N <sub>b</sub><br>N <sub>w</sub><br>N <sub>s</sub><br>N <sub>w</sub> +N <sub>s</sub><br>T <sub>3b</sub><br>T <sub>3a</sub><br>T <sub>3d</sub><br>0<br>N <sub>bf</sub>                                       | Ne of Bioko<br>Ne of Western<br>Ne of Southern<br>Ancestral Population before vicariance<br>Time of split between W & S<br>Time of split of Bioko<br>Time of Bioko founder event<br>Present<br>Ne of Bioko at founder event                                                                        |
| 19 | An ancestral cluster (Nw+N <sub>s</sub> ) was divided into the Western (Nw) and Southern (N <sub>s</sub> ) clusters through vicariance. The ancestral population was in the west. More recently, the Bioko Island population (N <sub>b</sub> ) split off from the Southern cluster through a vicariance event.                                                                                                                                    | N <sub>b</sub><br>N <sub>w</sub><br>N <sub>s</sub><br>N <sub>w</sub> +N <sub>s</sub><br>T <sub>4b</sub><br>T <sub>4a</sub><br>0                                                                             | Ne of Bioko<br>Ne of Western<br>Ne of Southern<br>Ancestral Population before vicariance<br>Time of split between W & S<br>Time of split of Bioko<br>Present                                                                                                                                       |

|    |                                                                                                                                                                                                                                                                                                                                                                                                                                                                                  |                                                                                                |                                                                                                                                                                                                                                                                                                                                                       |
|----|----------------------------------------------------------------------------------------------------------------------------------------------------------------------------------------------------------------------------------------------------------------------------------------------------------------------------------------------------------------------------------------------------------------------------------------------------------------------------------|------------------------------------------------------------------------------------------------|-------------------------------------------------------------------------------------------------------------------------------------------------------------------------------------------------------------------------------------------------------------------------------------------------------------------------------------------------------|
| 20 | <p>An ancestral population (Nanc) gave rise to the Western and Southern clusters via founding events, creating bottlenecked populations Nwf (Western) and Nsf (Southern). These expanded to contemporary populations Nw and Ns. The ancestral population was from the west. More recently, the Bioko island population split off from the Southern cluster through vicariance.</p>                                                                                               | <p>Nb<br/>Nw<br/>Ns<br/>Nanc<br/>T4b<br/>T4a<br/>T4c<br/>0<br/>Nwf<br/>Nsf</p>                 | <p>Ne of Bioko<br/>Ne of Western<br/>Ne of Southern<br/>Ancestral Population to W &amp; S<br/>Time of split between W &amp; S<br/>Time of split of Bioko<br/>Time of W&amp;S founder event<br/>Present<br/>Ne of Western following founding event<br/>Ne of Southern following founding event</p>                                                     |
| 21 | <p>An ancestral population (Nanc) gave rise to the Western and Southern clusters through founding events, creating bottlenecked populations Nwf (western) and Nsf (southern). These later expanded to contemporary populations Nw and Ns. The ancestral population was from the west. More recently, the Bioko island population was created during a founding event (Nbf) from the Southern cluster. The Bioko population expanded to Nb after this initial founding event.</p> | <p>Nb<br/>Nw<br/>Ns<br/>Nanc<br/>T4b<br/>T4a<br/>T4c<br/>T4d<br/>0<br/>Nwf<br/>Nsf<br/>Nbf</p> | <p>Ne of Bioko<br/>Ne of Western<br/>Ne of Southern<br/>Ancestral Population to W &amp; S<br/>Time of split between W &amp; S<br/>Time of split of Bioko<br/>Time of W &amp; S founder events<br/>Time of Bioko founder event<br/>Present<br/>Ne of Western at founder event<br/>Ne of Southern at founder event<br/>Ne of Bioko at founder event</p> |

|    |                                                                                                                                                                                                                                                                                                                                                                                                                                                                                                         |                                                                                                                |                                                                                                                                                                                                                                                                                                                                                                                                                                |
|----|---------------------------------------------------------------------------------------------------------------------------------------------------------------------------------------------------------------------------------------------------------------------------------------------------------------------------------------------------------------------------------------------------------------------------------------------------------------------------------------------------------|----------------------------------------------------------------------------------------------------------------|--------------------------------------------------------------------------------------------------------------------------------------------------------------------------------------------------------------------------------------------------------------------------------------------------------------------------------------------------------------------------------------------------------------------------------|
| 22 | <p>An ancestral population (Nanc) was divided into the Western and Southern clusters through founding events, creating bottlenecked populations Nwf (western) and Nsf (southern). These later expanded to contemporary populations Nw and Ns. The ancestral population was from the west. More recently, the Bioko island population was created through a founding event (Nbf) from the Southern cluster. A very recent vector-control induced bottleneck reduced population sizes on Bioko (Nbb).</p> | <p>Nb<br/>Nw<br/>Ns<br/>Nanc<br/>T4b<br/>T4a<br/>T4c<br/>T4d<br/>T4e<br/>0<br/>Nwf<br/>Nsf<br/>Nbf<br/>Nbb</p> | <p>Ne of Bioko<br/>Ne of Western<br/>Ne of Southern<br/>Ancestral Population to W &amp; S<br/>Time of split between W &amp; S<br/>Time of split of Bioko<br/>Time of W &amp; S founder events<br/>Time of Bioko founder event<br/>Time of recent Bioko bottleneck<br/>Present<br/>Ne of Western at founder event<br/>Ne of Southern at founder event<br/>Ne of Bioko at founder event<br/>Ne of Bioko at recent bottleneck</p> |
| 23 | <p>An ancestral cluster (Nw+Ns) was divided into the Western (Nw) and Southern (Ns) clusters through vicariance. The ancestral population was from the west. More recently, the Bioko island population was created through a founding event (Nbf) from the Southern cluster. A very recent vector-control induced bottleneck reduced population sizes on Bioko (Nbb).</p>                                                                                                                              | <p>Nb<br/>Nw<br/>Ns<br/>Nw+Ns<br/>T4b<br/>T4a<br/>T4d<br/>T4e<br/>0<br/>Nbf<br/>Nbb</p>                        | <p>Ne of Bioko<br/>Ne of Western<br/>Ne of Southern<br/>Ancestral Population before vicariance<br/>Time of split between W &amp; S<br/>Time of split of Bioko<br/>Time of Bioko founder event<br/>Time of recent Bioko bottleneck<br/>Present<br/>Ne of Bioko at founder event<br/>Ne of Bioko at recent bottleneck</p>                                                                                                        |

|    |                                                                                                                                                                                                                                                                                                                                                                           |                                                          |                                                                                                                                                                                                                             |
|----|---------------------------------------------------------------------------------------------------------------------------------------------------------------------------------------------------------------------------------------------------------------------------------------------------------------------------------------------------------------------------|----------------------------------------------------------|-----------------------------------------------------------------------------------------------------------------------------------------------------------------------------------------------------------------------------|
| 24 | An ancestral cluster (Nw+Ns) split equally into the Western (Nw) and Southern (Ns) clusters by vicariance, where the Southern split off from the Western. At a more recent time, the Bioko island population was created during a founding event (Nbf) when it diverged from the Southern cluster. The Bioko population expanded to Nb after this initial founding event. | Nb<br>Nw<br>Ns<br>Nw+Ns<br>T4b<br>T4a<br>T4d<br>0<br>Nbf | Ne of Bioko<br>Ne of Western<br>Ne of Southern<br>Ancestral Population before vicariance<br>Time of split between W & S<br>Time of split of Bioko<br>Time of Bioko founder event<br>Present<br>Ne of Bioko at founder event |
|----|---------------------------------------------------------------------------------------------------------------------------------------------------------------------------------------------------------------------------------------------------------------------------------------------------------------------------------------------------------------------------|----------------------------------------------------------|-----------------------------------------------------------------------------------------------------------------------------------------------------------------------------------------------------------------------------|

51

52

53

54

55

56

57

58

59

60 **Table S3:** Notations of parameters listed in Table S2 and prior ranges and parameterization  
 61 conditions used in simulations.

| Symbol             | Priors          | Steps | Conditions                                    |
|--------------------|-----------------|-------|-----------------------------------------------|
| Nb                 | [0:35000]       | 100   |                                               |
| Nn                 | [0:35000]       | 100   |                                               |
| Ns                 | [0:35000]       | 100   |                                               |
| Nbf                | [0:35000]       | 100   |                                               |
| Nwf                | [0:35000]       | 100   |                                               |
| Nsf                | [0:35000]       | 100   |                                               |
| Nbb                | [0:35000]       | 100   |                                               |
| Nanc               | [0:35000]       | 100   | Nanc>Nwf<br>Nanc>Nsf                          |
| t1a, t2a, t3a, t4a | [0:7500000]     | 1000  |                                               |
| t1b, t2b, t3b, t4b | [0:7500000]     | 1000  |                                               |
| t1c, t2c, t3c, t4c | [11000:7500000] | 1000  | >t1a ( t2a, t3a, t4a)<br>≤t1b (t2b, t3b, t4b) |
| t1d, t2d, t3d, t4d | [11000:7500000] | 1000  | ≤t1a (t2a, t3a, t4a)                          |
| t1e, t2e, t3e, t4e | [0:11000]       | 50    |                                               |

62

63

64 **Table S3** Population diversity estimates at each of 15 *An. melas* specific loci amplified in four *An. melas*  
 65 populations. Bold indicates significance after Bonferroni correction (p-val.<0.0003). Grey shaded HWE p-val.  
 66 indicates that null alleles were detected by Micro-Checker for the denoted locus/population comparison. *Ar*,  
 67 allelic richness, rarefied to  $N=16$ .  $H_O$ , observed heterozygosity.  $H_E$ , expected heterozygosity. HWE p-val.,  
 68 Hardy-Weinberg Equilibrium test p-value. Population abbreviations correspond with those defined in Table 1.

| Locus   | ARB       |       |       |               | RIA       |       |       |               | CAC       |       |       |               |
|---------|-----------|-------|-------|---------------|-----------|-------|-------|---------------|-----------|-------|-------|---------------|
|         | <i>Ar</i> | $H_O$ | $H_E$ | HWD<br>P-val. | <i>Ar</i> | $H_O$ | $H_E$ | HWD<br>P-val. | <i>Ar</i> | $H_O$ | $H_E$ | HWD<br>P-val. |
| AMXH25  | 2.99      | 0.60  | 0.64  | 0.1562        | 2.83      | 0.12  | 0.47  | <b>0.0000</b> | 2.80      | 0.49  | 0.50  | 0.8168        |
| AMXH38  | 2.43      | 0.44  | 0.42  | 0.7327        | 2.22      | 0.41  | 0.36  | 0.1708        | 2.22      | 0.23  | 0.36  | 0.0483        |
| AM2H46  | 3.37      | 0.48  | 0.52  | 0.7424        | 3.81      | 0.57  | 0.63  | 0.6130        | 3.37      | 0.46  | 0.43  | 0.6431        |
| AM3H93  | 2.14      | 0.18  | 0.19  | 0.2905        | 3.00      | 0.32  | 0.36  | 0.0008        | 1.64      | 0.09  | 0.08  | 1.0000        |
| AM3H127 | 4.06      | 0.72  | 0.73  | 0.0697        | 4.10      | 0.80  | 0.74  | 0.3990        | 4.25      | 0.69  | 0.72  | 0.7677        |
| AM2H143 | 2.78      | 0.51  | 0.57  | 0.6549        | 3.00      | 0.60  | 0.58  | 0.0414        | 2.92      | 0.54  | 0.58  | 0.2347        |
| AM2H157 | 1.30      | 0.02  | 0.04  | 0.0321        | 1.32      | 0.04  | 0.04  | 1.0000        | 1.23      | 0.03  | 0.03  | 1.0000        |
| AM2H215 | 2.89      | 0.57  | 0.56  | 0.6469        | 3.04      | 0.58  | 0.58  | 0.5854        | 2.88      | 0.59  | 0.59  | 0.3941        |
| AMXH293 | 3.59      | 0.65  | 0.65  | 0.9527        | 3.69      | 0.63  | 0.64  | 0.7088        | 4.16      | 0.71  | 0.68  | 0.2587        |
| AM3H555 | 3.31      | 0.53  | 0.49  | 0.7807        | 3.42      | 0.36  | 0.47  | <b>0.0024</b> | 3.06      | 0.40  | 0.53  | 0.3244        |
| AM2H603 | 1.00      | 0.00  | 0.00  | N/A           | 1.00      | 0.00  | 0.00  | N/A           | 1.00      | 0.00  | 0.00  | N/A           |
| AM3H753 | 1.09      | 0.01  | 0.01  | 1.0000        | 1.65      | 0.12  | 0.11  | 1.0000        | 1.00      | 0.00  | 0.00  | N/A           |
| AMXH755 | 2.84      | 0.59  | 0.58  | 0.4411        | 3.03      | 0.61  | 0.60  | 1.0000        | 2.84      | 0.48  | 0.52  | 0.4672        |
| AM2H793 | 2.66      | 0.27  | 0.26  | 0.7239        | 2.40      | 0.19  | 0.20  | 0.0608        | 2.34      | 0.30  | 0.27  | 1.0000        |
| AMXH808 | 2.00      | 0.44  | 0.42  | 0.8117        | 2.17      | 0.43  | 0.40  | 0.8823        | 2.00      | 0.45  | 0.42  | 0.6909        |
| Mean    | 2.56      | 0.40  | 0.41  | –             | 2.71      | 0.39  | 0.41  | –             | 2.51      | 0.36  | 0.38  | –             |

69

70

**Table S3** (continued)

| Locus   | TIK       |                |                |               | GHA       |                |                |               | GAM       |                |                |               |
|---------|-----------|----------------|----------------|---------------|-----------|----------------|----------------|---------------|-----------|----------------|----------------|---------------|
|         | <i>Ar</i> | H <sub>O</sub> | H <sub>E</sub> | HWD<br>P-val. | <i>Ar</i> | H <sub>O</sub> | H <sub>E</sub> | HWD<br>P-val. | <i>Ar</i> | H <sub>O</sub> | H <sub>E</sub> | HWD<br>P-val. |
| AMXH25  | 5.84      | 0.75           | 0.80           | 0.4043        | 3.82      | 0.67           | 0.74           | 1.0000        | 3.94      | 0.61           | 0.64           | 0.3185        |
| AMXH38  | 8.03      | 0.81           | 0.90           | 0.1086        | 6.17      | 0.67           | 0.86           | 0.2652        | 8.80      | 0.87           | 0.90           | 0.0604        |
| AM2H46  | 6.83      | 0.81           | 0.86           | 0.8170        | 6.45      | 0.67           | 0.91           | 0.1745        | 6.32      | 0.81           | 0.83           | 0.0836        |
| AM3H93  | 4.47      | 0.75           | 0.65           | 0.7415        | 5.33      | 1.00           | 0.82           | 0.2001        | 7.80      | 0.88           | 0.87           | 0.1035        |
| AM3H127 | 5.48      | 0.88           | 0.81           | 0.4102        | 4.80      | 0.83           | 0.83           | 0.5589        | 4.24      | 0.63           | 0.72           | 0.1778        |
| AM2H143 | 6.76      | 0.47           | 0.78           | <b>0.0061</b> | 4.65      | 0.83           | 0.80           | 0.7802        | 6.24      | 0.82           | 0.82           | <b>0.0003</b> |
| AM2H157 | 6.88      | 0.88           | 0.84           | 0.3942        | 3.80      | 0.83           | 0.65           | 1.0000        | 6.36      | 0.88           | 0.82           | 0.5503        |
| AM2H215 | 6.89      | 0.81           | 0.84           | 0.3752        | 4.00      | 0.60           | 0.78           | 0.6942        | 5.98      | 0.83           | 0.80           | 0.9723        |
| AMXH293 | 7.93      | 0.88           | 0.88           | 0.7982        | 5.48      | 0.67           | 0.85           | 0.0193        | 6.56      | 0.83           | 0.83           | 0.6922        |
| AM3H555 | 6.75      | 0.75           | 0.84           | 0.2627        | 3.82      | 0.83           | 0.71           | 1.0000        | 5.69      | 0.65           | 0.73           | 0.1193        |
| AM2H603 | 3.99      | 0.50           | 0.50           | 1.0000        | 1.83      | 0.17           | 0.17           | 1.0000        | 2.03      | 0.19           | 0.18           | 1.0000        |
| AM3H753 | 2.65      | 0.25           | 0.28           | 0.3057        | 1.98      | 0.33           | 0.30           | 1.0000        | 2.41      | 0.22           | 0.21           | 1.0000        |
| AMXH755 | 5.83      | 0.56           | 0.76           | 0.1868        | 3.00      | 0.20           | 0.51           | 0.1106        | 3.44      | 0.67           | 0.60           | 0.8216        |
| AM2H793 | 9.03      | 0.69           | 0.91           | 0.0387        | 7.82      | 1.00           | 0.94           | 1.0000        | 8.85      | 0.91           | 0.90           | 0.9744        |
| AMXH808 | 6.32      | 0.73           | 0.82           | 0.6382        | 5.64      | 0.50           | 0.88           | 0.0614        | 5.90      | 0.84           | 0.80           | 0.1858        |
| Mean    | 6.25      | 0.70           | 0.77           | –             | 4.57      | 0.65           | 0.72           | –             | 5.64      | 0.71           | 0.71           | –             |
